# Supplementary material
Source: MDPI journal article supplement (https://www.mdpi.com/2073-4395/14/5/1051)
Supplement: s1 [file s1]

**Supplementary Table 1 (S1).** Tests of Between-Subjects Effects (ANOVA) for testing the effects (main and interactions) of Types of Stress (Control, Food-deprived, Water-deprived), Ages (5 days, 15 days, 30 days, 45 days), Sexes (males, females), Daytime Periods (07:00 – 14:59, 15:00 – 20:59) on movements during the daytime (squared root transformed data).

| Source                                           | Sum of Squares | <i>df</i> | Mean Square | <i>F</i> | <i>p</i> -value | Partial Eta Squared |
|--------------------------------------------------|----------------|-----------|-------------|----------|-----------------|---------------------|
| Types of Stress                                  | 4981.589       | 2         | 2490.795    | 30.964   | <0.001          | 0.120               |
| Ages                                             | 2934.633       | 3         | 978.211     | 12.160   | <0.001          | 0.074               |
| Sexes                                            | 642.034        | 1         | 642.034     | 7.981    | 0.005           | 0.017               |
| Ages × Sexes                                     | 1249.481       | 3         | 416.494     | 5.178    | 0.002           | 0.033               |
| Types of Stress × Ages                           | 2886.611       | 6         | 481.102     | 5.981    | <0.001          | 0.073               |
| Types of Stress × Sexes                          | 109.38         | 2         | 54.690      | 0.680    | 0.507           | 0.003               |
| Types of Stress × Ages × Sexes                   | 633.042        | 6         | 105.507     | 1.312    | 0.250           | 0.017               |
| Daytime Periods                                  | 3798.557       | 1         | 3798.557    | 267.662  | <0.001          | 0.370               |
| Ages × Daytime Periods                           | 130.465        | 3         | 43.488      | 3.064    | 0.028           | 0.020               |
| Sexes × Daytime Periods                          | 0.030          | 1         | 0.030       | 0.002    | 0.963           | <0.001              |
| Types of Stress × Daytime Periods                | 78.758         | 2         | 39.379      | 2.775    | 0.063           | 0.012               |
| Ages × Sexes × Daytime Periods                   | 197.539        | 3         | 65.846      | 4.640    | 0.003           | 0.030               |
| Types of Stress × Ages × Daytime Periods         | 172.444        | 6         | 28.741      | 2.025    | 0.061           | 0.026               |
| Types of Stress × Sexes × Daytime Periods        | 52.593         | 2         | 26.296      | 1.853    | 0.158           | 0.008               |
| Types of Stress × Ages × Sexes × Daytime Periods | 132.959        | 6         | 22.160      | 1.561    | 0.157           | 0.020               |

**Supplementary Table 2 (S2).** Mean and Transformed Mean (squared root transformation) with standard errors for the two Daytime Periods ( $\eta^2_{\text{partial}} = 0.370$ ).

| Daytime Periods | Mean (with Std. Error) | Transformed Mean (with Std. Error) |
|-----------------|------------------------|------------------------------------|
| 07:00 – 14:59   | 237.55 ± 10.2          | 13.65 ± 0.8                        |
| 15:00 – 20:59   | 379.12 ± 15.0          | 17.63 ± 0.8                        |

**Supplementary Table 3 (S3).** Mean and Transformed Mean (squared root transformation) with standard errors for the three Types of Stress ( $\eta^2_{\text{partial}} = 0.120$ ).

| Types of Stress | Mean (with Std. Error) | Transformed Mean (with Std. Error) |
|-----------------|------------------------|------------------------------------|
| Control         | 207.68 ± 11.9          | 12.67 ± 0.8                        |
| Food-deprived   | 413.84 ± 20.0          | 18.04 ± 0.8                        |
| Water-deprived  | 303.49 ± 13.4          | 16.08 ± 0.8                        |

**Supplementary Table 4 (S4).** Tests of Between-Subjects Effects (ANOVA) for testing the effects (main and interactions) of Types of Stress (Control, Food-deprived, Water-deprived), Ages (5 days, 15 days, 30 days, 45 days), Sexes (males, females) on movements during nighttime period [ $\log_{10}(x+1)$  transformed data].

| Source                         | Sum of Squares | <i>df</i> | Mean Square | <i>F</i> | <i>p</i> -value | Partial Eta Squared |
|--------------------------------|----------------|-----------|-------------|----------|-----------------|---------------------|
| Types of Stress                | 7.525          | 2         | 3.763       | 11.508   | <0.001          | 0.048               |
| Ages                           | 4.080          | 3         | 1.360       | 4.160    | 0.006           | 0.027               |
| Sexes                          | 0.036          | 1         | 0.036       | 0.109    | 0.741           | <0.001              |
| Types of Stress × Ages         | 5.592          | 6         | 0.932       | 2.851    | 0.010           | 0.036               |
| Types of Stress × Sexes        | 1.259          | 2         | 0.630       | 1.926    | 0.147           | 0.008               |
| Ages × Sexes                   | 10.036         | 3         | 3.345       | 10.232   | <0.001          | 0.063               |
| Types of Stress × Ages × Sexes | 4.731          | 6         | 0.789       | 2.412    | 0.026           | 0.031               |

**Supplementary Table 5 (S5).** Statistically Significant Differences (SSD) between the Daytime Periods (07:00 – 14:59 and 15:00 – 20:59) across the same age and the same Type of Stress in males with different lower-case letters correspond to statistically significant differences among mean values of transformed data (squared root transformation) at a significance level of  $\alpha = 0.05$ , according to the results of LSD criterion (for transformed data common LSD value = 2.34).

| Types of Stress | Age (days) | Daytime Periods | Mean (observed data) | Std. Error of Mean (observed data) | Mean Transformed data | SSD       |
|-----------------|------------|-----------------|----------------------|------------------------------------|-----------------------|-----------|
| Control         | 5          | 07:00 – 14:59   | 116.85               | 17.8                               | 10.10                 | <i>b</i>  |
|                 |            | 15:00 – 20:59   | 230.48               | 29.8                               | 14.54                 | <i>a</i>  |
|                 | 15         | 07:00 – 14:59   | 154.97               | 16.1                               | 12.03                 | <i>b</i>  |
|                 |            | 15:00 – 20:59   | 282.73               | 28.3                               | 16.44                 | <i>a</i>  |
|                 | 30         | 07:00 – 14:59   | 55.79                | 12.5                               | 6.64                  | <i>b</i>  |
|                 |            | 15:00 – 20:59   | 205.26               | 61.1                               | 11.87                 | <i>a</i>  |
|                 | 45         | 07:00 – 14:59   | 127.70               | 39.5                               | 9.19                  | <i>ns</i> |
|                 |            | 15:00 – 20:59   | 170.96               | 45.9                               | 11.25                 |           |
| Food-deprived   | 5          | 07:00 – 14:59   | 545.96               | 83.3                               | 21.90                 | <i>b</i>  |
|                 |            | 15:00 – 20:59   | 788.64               | 95.9                               | 26.79                 | <i>a</i>  |
|                 | 15         | 07:00 – 14:59   | 223.15               | 39.7                               | 13.43                 | <i>b</i>  |
|                 |            | 15:00 – 20:59   | 449.53               | 65.9                               | 20.05                 | <i>a</i>  |
|                 | 30         | 07:00 – 14:59   | 300.20               | 55.2                               | 14.86                 | <i>b</i>  |
|                 |            | 15:00 – 20:59   | 394.16               | 72.9                               | 18.19                 | <i>a</i>  |
|                 | 45         | 07:00 – 14:59   | 152.05               | 27.7                               | 10.86                 | <i>ns</i> |
|                 |            | 15:00 – 20:59   | 199.04               | 50.4                               | 12.26                 |           |
| Water-deprived  | 5          | 07:00 – 14:59   | 270.44               | 55.8                               | 14.81                 | <i>b</i>  |
|                 |            | 15:00 – 20:59   | 432.46               | 73.5                               | 19.04                 | <i>a</i>  |
|                 | 15         | 07:00 – 14:59   | 171.47               | 25.5                               | 12.15                 | <i>b</i>  |
|                 |            | 15:00 – 20:59   | 254.08               | 32.5                               | 15.11                 | <i>a</i>  |
|                 | 30         | 07:00 – 14:59   | 289.54               | 39.9                               | 16.27                 | <i>b</i>  |
|                 |            | 15:00 – 20:59   | 456.63               | 57.3                               | 20.49                 | <i>a</i>  |
|                 | 45         | 07:00 – 14:59   | 178.07               | 36.8                               | 11.86                 | <i>b</i>  |
|                 |            | 15:00 – 20:59   | 300.87               | 55.0                               | 15.69                 | <i>a</i>  |

Where: *ns*: non-significant

In males, the mean highest value recorded was  $788.64 \pm 95.9$  during the daytime (light) period 15:00 – 20:59 in 5-day-old individuals deprived of food, while the mean lowest value was recorded in control individuals 30-day-old during the daytime period 07:00 – 14:59 and was  $55.79 \pm 12.5$ .

**Supplementary Table 6 (S6).** Statistically Significant Differences (SSD) between the Daytime Periods (07:00 – 14:59 and 15:00 – 20:59) across the same age and the same Type of Stress in females with different lower-case letters correspond to statistically significant differences among mean values of transformed data (squared root transformation) at a significance level of  $\alpha = 0.05$ , according to the results of LSD criterion (for transformed data common LSD value = 2.34).

| Types of Stress | Age (days) | Daytime Periods | Mean   | Std. Error of Mean | Transformed Mean | SSD       |
|-----------------|------------|-----------------|--------|--------------------|------------------|-----------|
| Control         | 5          | 07:00 – 14:59   | 138.45 | 19.1               | 11.11            | <i>ns</i> |
|                 |            | 15:00 – 20:59   | 210.33 | 28.9               | 13.45            |           |
|                 | 15         | 07:00 – 14:59   | 213.38 | 33.2               | 13.61            | <i>b</i>  |
|                 |            | 15:00 – 20:59   | 385.86 | 60.0               | 18.27            | <i>a</i>  |
|                 | 30         | 07:00 – 14:59   | 184.98 | 32.6               | 12.44            | <i>b</i>  |
|                 |            | 15:00 – 20:59   | 436.49 | 77.8               | 19.03            | <i>a</i>  |
|                 | 45         | 07:00 – 14:59   | 170.32 | 53.0               | 10.08            | <i>b</i>  |
|                 |            | 15:00 – 20:59   | 238.38 | 69.4               | 12.76            | <i>a</i>  |
| Food-deprived   | 5          | 07:00 – 14:59   | 437.28 | 62.9               | 19.75            | <i>ns</i> |
|                 |            | 15:00 – 20:59   | 529.47 | 90.2               | 21.24            |           |
|                 | 15         | 07:00 – 14:59   | 236.07 | 36.9               | 14.32            | <i>b</i>  |
|                 |            | 15:00 – 20:59   | 431.98 | 72.5               | 19.53            | <i>a</i>  |
|                 | 30         | 07:00 – 14:59   | 418.39 | 65.2               | 18.34            | <i>b</i>  |
|                 |            | 15:00 – 20:59   | 738.02 | 103.3              | 25.44            | <i>a</i>  |
|                 | 45         | 07:00 – 14:59   | 257.06 | 61.2               | 13.67            | <i>b</i>  |
|                 |            | 15:00 – 20:59   | 520.48 | 99.6               | 20.78            | <i>a</i>  |
| Water-deprived  | 5          | 07:00 – 14:59   | 280.47 | 39.9               | 15.83            | <i>ns</i> |
|                 |            | 15:00 – 20:59   | 372.52 | 35.6               | 18.82            |           |
|                 | 15         | 07:00 – 14:59   | 176.19 | 18.5               | 12.76            | <i>ns</i> |
|                 |            | 15:00 – 20:59   | 192.63 | 31.1               | 13.07            |           |
|                 | 30         | 07:00 – 14:59   | 410.50 | 62.1               | 19.09            | <i>b</i>  |
|                 |            | 15:00 – 20:59   | 609.22 | 74.5               | 23.62            | <i>a</i>  |
|                 | 45         | 07:00 – 14:59   | 191.93 | 34.8               | 12.56            | <i>b</i>  |
|                 |            | 15:00 – 20:59   | 268.76 | 41.4               | 15.44            | <i>a</i>  |

Where: *ns*: non-significant

In females, the mean highest value recorded was  $738.02 \pm 103.3$  during the daytime (light) period 15:00 – 20:59 in 30-day-old individuals deprived of food, while the mean lowest value was recorded in control individuals 5-day-old during the daytime (light) period 07:00 – 14:59 and was  $138.45 \pm 19.0$ .

**Supplementary Table 7 (S7).** Statistically Significant Differences (SSD) between Types of Stress (control, food-deprived, and water-deprived) across the same age and in the same daytime period in males with different lower-case letters correspond to statistically significant differences among mean values of transformed data (squared root transformation) at a significance level of  $\alpha = 0.05$ , according to the results of LSD criterion (for transformed data common LSD value = 2.34).

| Daytime Periods | Ages (days) | Types of Stress | Mean   | Std. Error of Mean | Transformed Mean | SSD       |
|-----------------|-------------|-----------------|--------|--------------------|------------------|-----------|
| 07:00 – 14:59   | 5           | Control         | 116.85 | 17.8               | 10.10            | <i>c</i>  |
|                 |             | Food-deprived   | 545.96 | 83.3               | 21.90            | <i>a</i>  |
|                 |             | Water-deprived  | 270.44 | 55.8               | 14.81            | <i>b</i>  |
|                 | 15          | Control         | 154.97 | 16.1               | 12.03            | <i>ns</i> |
|                 |             | Food-deprived   | 223.15 | 39.7               | 13.43            |           |
|                 |             | Water-deprived  | 171.47 | 25.5               | 12.15            |           |
|                 | 30          | Control         | 55.79  | 12.5               | 6.64             | <i>b</i>  |
|                 |             | Food-deprived   | 300.20 | 55.2               | 14.86            | <i>a</i>  |
|                 |             | Water-deprived  | 289.54 | 39.9               | 16.27            | <i>a</i>  |
|                 | 45          | Control         | 127.70 | 39.5               | 9.19             | <i>b</i>  |
|                 |             | Food-deprived   | 152.05 | 27.7               | 10.86            | <i>ab</i> |
|                 |             | Water-deprived  | 178.07 | 36.8               | 11.86            | <i>a</i>  |
| 15:00 – 20:59   | 5           | Control         | 230.48 | 29.8               | 14.54            | <i>c</i>  |
|                 |             | Food-deprived   | 788.64 | 95.9               | 26.79            | <i>a</i>  |
|                 |             | Water-deprived  | 432.46 | 73.5               | 19.04            | <i>b</i>  |
|                 | 15          | Control         | 282.73 | 28.3               | 16.44            | <i>b</i>  |
|                 |             | Food-deprived   | 449.53 | 65.9               | 20.05            | <i>a</i>  |
|                 |             | Water-deprived  | 254.08 | 32.5               | 15.11            | <i>b</i>  |
|                 | 30          | Control         | 205.26 | 61.1               | 11.87            | <i>b</i>  |
|                 |             | Food-deprived   | 394.16 | 72.9               | 18.19            | <i>a</i>  |
|                 |             | Water-deprived  | 456.63 | 57.3               | 20.49            | <i>a</i>  |
|                 | 45          | Control         | 170.96 | 45.9               | 11.25            | <i>b</i>  |
|                 |             | Food-deprived   | 199.04 | 50.4               | 12.26            | <i>b</i>  |
|                 |             | Water-deprived  | 300.87 | 55.0               | 15.69            | <i>a</i>  |

Where: *ns*: non-significant

During the daytime period 07:00 – 14:59, males 5 & 30 days-old in the control group are more active than their counterparts in food and water deprived groups. During the daytime period 15:00 – 20:59, males 5, 15 & 30-days-old in the control group are more active than their counterparts in food and water deprived groups.

**Supplementary Table 8 (S8).** Statistically Significant Differences (SSD) between Types of Stress (control, food-deprived, and water-deprived) across the same age and in the same daytime period in females with different lower-case letters correspond to statistically significant differences among mean values of transformed data (squared root transformation) at a significance level of  $\alpha = 0.05$ , according to the results of LSD criterion (for transformed data common LSD value = 2.34).

| Daytime Periods | Ages (days) | Types of Stress | Mean   | Std. Error of Mean | Transformed Mean | SSD       |
|-----------------|-------------|-----------------|--------|--------------------|------------------|-----------|
| 07:00 – 14:59   | 5           | Control         | 138.45 | 19.0               | 11.11            | <i>c</i>  |
|                 |             | Food-deprived   | 437.28 | 62.9               | 19.75            | <i>a</i>  |
|                 |             | Water-deprived  | 280.47 | 39.9               | 15.83            | <i>b</i>  |
|                 | 15          | Control         | 213.38 | 33.2               | 13.61            | <i>ns</i> |
|                 |             | Food-deprived   | 236.07 | 36.9               | 14.32            |           |
|                 |             | Water-deprived  | 176.19 | 18.5               | 12.76            |           |
|                 | 30          | Control         | 184.98 | 32.6               | 12.44            | <i>b</i>  |
|                 |             | Food-deprived   | 418.39 | 65.2               | 18.35            | <i>a</i>  |
|                 |             | Water-deprived  | 410.50 | 62.1               | 19.09            | <i>a</i>  |
|                 | 45          | Control         | 170.32 | 53.0               | 10.08            | <i>c</i>  |
|                 |             | Food-deprived   | 257.06 | 61.2               | 13.67            | <i>a</i>  |
|                 |             | Water-deprived  | 191.93 | 34.8               | 12.56            | <i>ab</i> |
| 15:00 – 20:59   | 5           | Control         | 210.33 | 28.9               | 13.45            | <i>c</i>  |
|                 |             | Food-deprived   | 529.47 | 90.2               | 21.24            | <i>a</i>  |
|                 |             | Water-deprived  | 372.52 | 35.6               | 18.82            | <i>b</i>  |
|                 | 15          | Control         | 385.86 | 60.0               | 18.27            | <i>a</i>  |
|                 |             | Food-deprived   | 431.98 | 72.5               | 19.53            | <i>a</i>  |
|                 |             | Water-deprived  | 192.63 | 31.1               | 13.07            | <i>b</i>  |
|                 | 30          | Control         | 436.49 | 77.8               | 19.03            | <i>b</i>  |
|                 |             | Food-deprived   | 738.02 | 103.3              | 25.44            | <i>a</i>  |
|                 |             | Water-deprived  | 609.22 | 74.5               | 23.62            | <i>a</i>  |
|                 | 45          | Control         | 238.38 | 69.4               | 12.76            | <i>c</i>  |
|                 |             | Food-deprived   | 520.48 | 99.6               | 20.78            | <i>a</i>  |
|                 |             | Water-deprived  | 268.76 | 41.4               | 15.44            | <i>b</i>  |

Where: *ns*: non-significant

During the daytime periods 07:00 – 14:59 and 15:00 – 20:59, females 5, 30, & 45-days-old in the control group are more active than their counterparts in food and water deprived groups.

**Supplementary Table 9 (S9).** Statistically Significant Differences (SSD) between ages across the same Type of Stress (control, food-deprived, and water-deprived), and in the same daytime period in males with different lower-case letters correspond to statistically significant differences among mean values of transformed data (squared root transformation) at a significance level of  $\alpha = 0.05$ , according to the results of LSD criterion (for transformed data common LSD value = 2.34).

| Daytime Periods | Types of Stress | Ages (days) | Mean   | Std. Error of Mean | Transformed Mean | SSD       |
|-----------------|-----------------|-------------|--------|--------------------|------------------|-----------|
| 07:00 – 14:59   | Control         | 5           | 116.85 | 17.8               | 10.10            | <i>ab</i> |
|                 |                 | 15          | 154.97 | 16.1               | 12.03            | <i>a</i>  |
|                 |                 | 30          | 55.79  | 12.5               | 6.64             | <i>c</i>  |
|                 |                 | 45          | 127.70 | 39.5               | 9.19             | <i>b</i>  |
|                 | Food-deprived   | 5           | 545.96 | 83.3               | 21.90            | <i>a</i>  |
|                 |                 | 15          | 223.15 | 39.7               | 13.43            | <i>bc</i> |
|                 |                 | 30          | 300.20 | 55.2               | 14.86            | <i>b</i>  |
|                 |                 | 45          | 152.05 | 27.7               | 10.86            | <i>d</i>  |
|                 | Water-deprived  | 5           | 270.44 | 55.8               | 14.81            | <i>a</i>  |
|                 |                 | 15          | 171.47 | 25.5               | 12.15            | <i>b</i>  |
|                 |                 | 30          | 289.54 | 39.9               | 16.27            | <i>a</i>  |
|                 |                 | 45          | 178.07 | 36.8               | 11.86            | <i>b</i>  |
| 15:00 – 20:59   | Control         | 5           | 230.48 | 29.8               | 14.54            | <i>a</i>  |
|                 |                 | 15          | 282.73 | 28.3               | 16.44            | <i>a</i>  |
|                 |                 | 30          | 205.26 | 61.1               | 11.87            | <i>b</i>  |
|                 |                 | 45          | 170.96 | 45.9               | 11.25            | <i>b</i>  |
|                 | Food-deprived   | 5           | 788.64 | 95.9               | 26.79            | <i>a</i>  |
|                 |                 | 15          | 449.53 | 65.9               | 20.05            | <i>b</i>  |
|                 |                 | 30          | 394.16 | 72.9               | 18.19            | <i>bc</i> |
|                 |                 | 45          | 199.04 | 50.4               | 12.26            | <i>d</i>  |
|                 | Water-deprived  | 5           | 432.46 | 73.5               | 19.04            | <i>a</i>  |
|                 |                 | 15          | 254.08 | 32.5               | 15.11            | <i>b</i>  |
|                 |                 | 30          | 456.63 | 57.3               | 20.49            | <i>a</i>  |
|                 |                 | 45          | 300.87 | 55.0               | 15.69            | <i>b</i>  |

During the daytime period 07:00 – 14:59, the mean highest value in recorded mobility was  $545.96 \pm 83.3$  (movements) observed in 5-days-old males deprived of food, while the mean lowest value recorded was  $55.79 \pm 12.5$ , observed in 30-days-old control males during the daytime period 07:00 – 14:59.

During the daytime period 15:00 – 20:59, the maximum mean value in recorded mobility was  $788.68 \pm 95.9$  (movements), observed in 5-days-old males deprived of food, while the minimum mean value in recorded mobility was  $170.96 \pm 45.9$ , observed in 45-days-old males in the control group.

**Supplementary Table 10 (S10).** Statistically Significant Differences (SSD) between ages across the same Type of Stress (control, food-deprived, and water-deprived), and in the same daytime period in females with different lower-case letters correspond to statistically significant differences among mean values of transformed data (squared root transformation) at a significance level of  $\alpha = 0.05$ , according to the results of LSD criterion (for transformed data common LSD value = 2.34).

| Daytime Periods | Types of Stress | Ages (days) | Mean   | Std. Error of Mean | Transformed Mean | SSD       |
|-----------------|-----------------|-------------|--------|--------------------|------------------|-----------|
| 07:00 – 14:59   | Control         | 5           | 138.45 | 19.0               | 11.11            | <i>bc</i> |
|                 |                 | 15          | 213.38 | 33.2               | 13.61            | <i>a</i>  |
|                 |                 | 30          | 184.98 | 32.6               | 12.44            | <i>ab</i> |
|                 |                 | 45          | 170.32 | 53.0               | 10.08            | <i>c</i>  |
|                 | Food-deprived   | 5           | 437.28 | 62.9               | 19.75            | <i>a</i>  |
|                 |                 | 15          | 236.07 | 36.9               | 14.32            | <i>b</i>  |
|                 |                 | 30          | 418.39 | 65.2               | 18.35            | <i>a</i>  |
|                 |                 | 45          | 257.06 | 61.2               | 13.67            | <i>b</i>  |
|                 | Water-deprived  | 5           | 280.47 | 39.9               | 15.83            | <i>b</i>  |
|                 |                 | 15          | 176.19 | 18.5               | 12.76            | <i>c</i>  |
|                 |                 | 30          | 410.50 | 62.1               | 19.09            | <i>a</i>  |
|                 |                 | 45          | 191.93 | 34.8               | 12.56            | <i>c</i>  |
| 15:00 – 20:59   | Control         | 5           | 210.33 | 28.9               | 13.45            | <i>b</i>  |
|                 |                 | 15          | 385.86 | 60.0               | 18.27            | <i>a</i>  |
|                 |                 | 30          | 436.49 | 77.8               | 19.03            | <i>a</i>  |
|                 |                 | 45          | 238.38 | 69.4               | 12.76            | <i>b</i>  |
|                 | Food-deprived   | 5           | 529.47 | 90.2               | 21.24            | <i>b</i>  |
|                 |                 | 15          | 431.98 | 72.5               | 19.53            | <i>b</i>  |
|                 |                 | 30          | 738.02 | 103.3              | 25.44            | <i>a</i>  |
|                 |                 | 45          | 520.48 | 99.6               | 20.78            | <i>b</i>  |
|                 | Water-deprived  | 5           | 372.52 | 35.6               | 18.82            | <i>b</i>  |
|                 |                 | 15          | 192.63 | 31.1               | 13.07            | <i>d</i>  |
|                 |                 | 30          | 609.22 | 74.5               | 23.62            | <i>a</i>  |
|                 |                 | 45          | 268.76 | 41.4               | 15.44            | <i>c</i>  |

During the daytime period 07:00 – 14:59, the mean highest value in recorded mobility was  $437.28 \pm 62.9$  (movements) observed in 5-days-old females deprived of food, while the mean lowest value recorded was  $138.45 \pm 19.0$ , observed in 5-days-old control females during the daytime period 07:00 – 14:59.

During the daytime period 15:00 – 20:59, the maximum mean value in recorded mobility was  $738.02 \pm 103.3$  (movements), observed in 30-days-old females deprived of food, while the minimum mean value in recorded mobility was  $192.63 \pm 31.1$ , observed in 15-days-old females deprived of water.



**Supplementary Table 11 (S11).** Statistically Significant Differences (SSD) between sexes across the same age and the same Type of Stress (control, food-deprived, and water-deprived), in the 07:00 – 14:59 Daytime Period with different lower-case letters correspond to statistically significant differences among mean values of transformed data (squared root transformation) at a significance level of  $\alpha = 0.05$ , according to the results of LSD criterion (for transformed data common LSD value = 2.34).

| Types of Stress | Ages<br>(in days) | Sexes | Mean   | Std. Error<br>of Mean | Transformed<br>Mean | SSD       |
|-----------------|-------------------|-------|--------|-----------------------|---------------------|-----------|
| Control         | 5                 | ♂     | 116.85 | 17.8                  | 10.10               | <i>ns</i> |
|                 |                   | ♀     | 138.45 | 19.0                  | 11.11               |           |
|                 | 15                | ♂     | 154.97 | 16.1                  | 12.03               | <i>ns</i> |
|                 |                   | ♀     | 213.38 | 33.2                  | 13.61               |           |
|                 | 30                | ♂     | 55.79  | 12.5                  | 6.64                | <i>b</i>  |
|                 |                   | ♀     | 184.98 | 32.6                  | 12.44               | <i>a</i>  |
|                 | 45                | ♂     | 127.70 | 39.5                  | 9.19                | <i>ns</i> |
|                 |                   | ♀     | 170.32 | 53.0                  | 10.08               |           |
|                 | 5                 | ♂     | 545.96 | 83.3                  | 21.90               | <i>ns</i> |
|                 |                   | ♀     | 437.28 | 62.9                  | 19.75               |           |
| Food-deprived   | 15                | ♂     | 223.15 | 39.7                  | 13.43               | <i>ns</i> |
|                 |                   | ♀     | 236.07 | 36.9                  | 14.32               |           |
|                 | 30                | ♂     | 300.20 | 55.2                  | 14.86               | <i>b</i>  |
|                 |                   | ♀     | 418.39 | 65.2                  | 18.35               | <i>a</i>  |
|                 | 45                | ♂     | 152.05 | 27.7                  | 10.86               | <i>b</i>  |
|                 |                   | ♀     | 257.06 | 61.2                  | 13.67               | <i>a</i>  |
|                 | 5                 | ♂     | 270.44 | 55.8                  | 14.81               | <i>ns</i> |
|                 |                   | ♀     | 280.47 | 39.9                  | 15.83               |           |
| Water-deprived  | 15                | ♂     | 171.47 | 25.5                  | 12.15               | <i>ns</i> |
|                 |                   | ♀     | 176.19 | 18.5                  | 12.76               |           |
|                 | 30                | ♂     | 289.54 | 39.9                  | 16.27               | <i>b</i>  |
|                 |                   | ♀     | 410.50 | 62.1                  | 19.09               | <i>a</i>  |
|                 | 45                | ♂     | 178.07 | 36.8                  | 11.86               | <i>ns</i> |
|                 |                   | ♀     | 191.93 | 34.8                  | 12.56               |           |

Where: ♂: males, ♀: females and *ns*: non-significant

During the daytime period 07:00 – 14:59, 30-day-old females in the control group, in the deprived of food group and in the deprived of water group, are more active than their male counterparts.

**Supplementary Table 12 (S12).** Statistically Significant Differences (SSD) between sexes across the same age and the same Type of Stress (control, food-deprived, and water-deprived), in the 15:00 – 20:59 Daytime Period with different lower-case letters correspond to statistically significant differences among mean values of transformed data (squared root transformation) at a significance level of  $\alpha = 0.05$ , according to the results of LSD criterion (for transformed data common LSD value = 2.34).

| Types of Stress | Ages (days) | Sexes | Mean   | Std. Error of Mean | Transformed Mean | SSD       |
|-----------------|-------------|-------|--------|--------------------|------------------|-----------|
| Control         | 5           | ♂     | 230.48 | 29.8               | 14.54            | <i>ns</i> |
|                 |             | ♀     | 210.33 | 28.9               | 13.45            |           |
|                 | 15          | ♂     | 282.73 | 28.3               | 16.44            | <i>ns</i> |
|                 |             | ♀     | 385.86 | 60.0               | 18.27            |           |
|                 | 30          | ♂     | 205.26 | 61.1               | 11.87            | <i>b</i>  |
|                 |             | ♀     | 436.49 | 77.8               | 19.03            | <i>a</i>  |
|                 | 45          | ♂     | 170.96 | 45.9               | 11.25            | <i>ns</i> |
|                 |             | ♀     | 238.38 | 69.4               | 12.76            |           |
|                 | 5           | ♂     | 788.64 | 95.9               | 26.79            | <i>a</i>  |
|                 |             | ♀     | 529.47 | 90.2               | 21.24            | <i>b</i>  |
| Food-deprived   | 15          | ♂     | 449.53 | 65.9               | 20.05            | <i>ns</i> |
|                 |             | ♀     | 431.98 | 72.5               | 19.53            |           |
|                 | 30          | ♂     | 394.16 | 72.9               | 18.19            | <i>b</i>  |
|                 |             | ♀     | 738.02 | 103.3              | 25.44            | <i>a</i>  |
|                 | 45          | ♂     | 199.04 | 50.4               | 12.26            | <i>b</i>  |
|                 |             | ♀     | 520.48 | 99.6               | 20.78            | <i>a</i>  |
|                 | 5           | ♂     | 432.46 | 73.5               | 19.04            | <i>ns</i> |
|                 |             | ♀     | 372.52 | 35.6               | 18.82            |           |
|                 | 15          | ♂     | 254.08 | 32.5               | 15.11            | <i>a</i>  |
|                 |             | ♀     | 192.63 | 31.1               | 13.07            | <i>b</i>  |
| Water-deprived  | 30          | ♂     | 456.63 | 57.3               | 20.49            | <i>b</i>  |
|                 |             | ♀     | 609.22 | 74.5               | 23.62            | <i>a</i>  |
|                 | 45          | ♂     | 300.87 | 55.0               | 15.69            | <i>ns</i> |
|                 |             | ♀     | 268.76 | 41.4               | 15.44            |           |

Where: ♂: males, ♀: females and *ns*: non-significant

During the daytime period 15:00 – 20:59, 30-day-old females in the control group, in the deprived of food group and in the deprived of water group, and 45-day-old females deprived of food, are more active than their male counterparts. Conversely, 5-day-old males deprived of food, and 15-day-old males deprived of water are more active than their female counterparts.

**Supplementary Table 13 (S13).** Statistically Significant Differences (SSD) between the Types of Stress (control, food-deprived, and water-deprived) across the same age and the same sex in nighttime period with different lower-case letters correspond to statistically significant differences among mean values of transformed data [ $\log_{10}(x+1)$  transformation] at a significance level of  $\alpha = 0.05$ , according to the results of LSD criterion (for transformed data common LSD value = 0.36).

| Sexes | Ages (days) | Types of Stress | Mean  | Std. Error of Mean | Transformed Mean | SSD       |
|-------|-------------|-----------------|-------|--------------------|------------------|-----------|
| ♂     | 5           | Control         | 5.34  | 2.8                | 0.50             | <i>c</i>  |
|       |             | Food-deprived   | 21.43 | 5.9                | 1.07             | <i>ab</i> |
|       |             | Water-deprived  | 33.80 | 11.4               | 1.22             | <i>a</i>  |
|       | 15          | Control         | 17.50 | 5.0                | 1.00             | <i>ab</i> |
|       |             | Food-deprived   | 16.76 | 6.2                | 0.81             | <i>b</i>  |
|       |             | Water-deprived  | 29.50 | 6.8                | 1.21             | <i>a</i>  |
|       | 30          | Control         | 5.51  | 2.3                | 0.52             | <i>b</i>  |
|       |             | Food-deprived   | 21.83 | 5.7                | 0.96             | <i>a</i>  |
|       |             | Water-deprived  | 26.06 | 8.6                | 1.04             | <i>a</i>  |
|       | 45          | Control         | 19.19 | 6.2                | 0.81             | <i>ab</i> |
|       |             | Food-deprived   | 20.16 | 14.7               | 0.60             | <i>b</i>  |
|       |             | Water-deprived  | 20.86 | 4.9                | 1.03             | <i>a</i>  |
| ♀     | 5           | Control         | 2.30  | 0.6                | 0.41             |           |
|       |             | Food-deprived   | 8.69  | 2.6                | 0.66             | <i>ns</i> |
|       |             | Water-deprived  | 7.54  | 1.8                | 0.73             |           |
|       | 15          | Control         | 16.72 | 6.3                | 0.86             | <i>ab</i> |
|       |             | Food-deprived   | 6.36  | 1.9                | 0.62             | <i>b</i>  |
|       |             | Water-deprived  | 15.85 | 4.0                | 1.04             | <i>a</i>  |
|       | 30          | Control         | 19.94 | 7.3                | 0.86             |           |
|       |             | Food-deprived   | 36.23 | 18.3               | 0.95             | <i>ns</i> |
|       |             | Water-deprived  | 33.10 | 10.6               | 1.14             |           |
|       | 45          | Control         | 25.49 | 8.2                | 1.07             | <i>b</i>  |
|       |             | Food-deprived   | 82.01 | 21.7               | 1.55             | <i>a</i>  |
|       |             | Water-deprived  | 21.05 | 6.0                | 1.08             | <i>b</i>  |

Where: ♂: males, ♀: females and *ns*: non-significant

During the nighttime period, the mean highest value recorded was  $82.01 \pm 21.7$  in 45-day-old females deprived of food, while the mean lowest value was  $2.30 \pm 0.6$  in 5-days-old females in the control group. During the nighttime period, the mean highest value recorded was  $33.80 \pm 11.4$  in 5-day-old males deprived of water, while the mean lowest value was  $5.34 \pm 2.8$  in 5-days-old males in the control group.

**Supplementary Table 14 (S14).** Statistically Significant Differences (SSD) between ages across the same Type of Stress (control, food-deprived, and water-deprived), and the same sex in nighttime period with different lower-case letters correspond to statistically significant differences among mean values of transformed data [ $\log_{10}(x+1)$  transformation] at a significance level of  $\alpha = 0.05$ , according to the results of LSD criterion (for transformed data common LSD value = 0.36).

| Sexes | Types of Stress | Ages (days) | Mean  | Std. Error of Mean | Transformed Mean | SSD       |
|-------|-----------------|-------------|-------|--------------------|------------------|-----------|
| ♂     | Control         | 5           | 5.34  | 2.8                | 0.50             | <i>b</i>  |
|       |                 | 15          | 17.50 | 5.0                | 1.00             | <i>a</i>  |
|       |                 | 30          | 5.51  | 2.3                | 0.52             | <i>b</i>  |
|       |                 | 45          | 19.19 | 6.2                | 0.81             | <i>ab</i> |
|       | Food-deprived   | 5           | 21.43 | 5.9                | 1.07             | <i>a</i>  |
|       |                 | 15          | 16.76 | 6.2                | 0.81             | <i>ab</i> |
|       |                 | 30          | 21.83 | 5.7                | 0.96             | <i>a</i>  |
|       |                 | 45          | 20.16 | 14.7               | 0.60             | <i>b</i>  |
|       | Water-deprived  | 5           | 33.80 | 11.4               | 1.22             | <i>ns</i> |
|       |                 | 15          | 29.50 | 6.8                | 1.21             |           |
|       |                 | 30          | 26.06 | 8.6                | 1.04             |           |
|       |                 | 45          | 20.86 | 4.9                | 1.03             |           |
| ♀     | Control         | 5           | 2.30  | 0.6                | 0.41             | <i>b</i>  |
|       |                 | 15          | 16.72 | 6.3                | 0.86             | <i>a</i>  |
|       |                 | 30          | 19.94 | 7.3                | 0.86             | <i>a</i>  |
|       |                 | 45          | 25.49 | 8.2                | 1.07             | <i>a</i>  |
|       | Food-deprived   | 5           | 8.69  | 2.6                | 0.66             | <i>b</i>  |
|       |                 | 15          | 6.36  | 1.9                | 0.62             | <i>b</i>  |
|       |                 | 30          | 36.23 | 18.3               | 0.95             | <i>b</i>  |
|       |                 | 45          | 82.01 | 21.7               | 1.55             | <i>a</i>  |
|       | Water-deprived  | 5           | 7.54  | 1.8                | 0.73             | <i>b</i>  |
|       |                 | 15          | 15.85 | 4.0                | 1.04             | <i>ab</i> |
|       |                 | 30          | 33.10 | 10.6               | 1.14             | <i>a</i>  |
|       |                 | 45          | 21.05 | 6.0                | 1.08             | <i>ab</i> |

Where: ♂: males, ♀: females and *ns*: non-significant

In males, during the nighttime period, the mean highest value in recorded mobility was  $33.8 \pm 11.4$  (movements) in 5-day-old individuals deprived of water, while the mean lowest value in recorded mobility in control individuals aged 5 days and was  $5.34 \pm 2.8$  (movements).

**Supplementary Table 15 (S15).** Statistically Significant Differences (SSD) between sexes across the same age and the same Type of Stress (control, food-deprived, and water-deprived), in nighttime period with different lower-case letters correspond to statistically significant differences among mean values of transformed data [ $\log_{10}(x+1)$  transformation] at a significance level of  $\alpha = 0.05$ , according to the results of LSD criterion (for transformed data common LSD value = 0.36).

| Types of Stress | Ages (days) | Sexes | Mean  | Std. Error of Mean | Transformed Mean | SSD       |
|-----------------|-------------|-------|-------|--------------------|------------------|-----------|
| Control         | 5           | ♂     | 5.34  | 2.8                | 0.50             | <i>ns</i> |
|                 |             | ♀     | 2.30  | 0.6                | 0.41             |           |
|                 | 15          | ♂     | 17.50 | 5.0                | 1.00             | <i>ns</i> |
|                 |             | ♀     | 16.72 | 6.3                | 0.86             |           |
|                 | 30          | ♂     | 5.51  | 2.3                | 0.52             | <i>ns</i> |
|                 |             | ♀     | 19.94 | 7.3                | 0.86             |           |
|                 | 45          | ♂     | 19.19 | 6.2                | 0.81             | <i>ns</i> |
|                 |             | ♀     | 25.49 | 8.2                | 1.07             |           |
|                 | 5           | ♂     | 21.43 | 5.9                | 1.07             | <i>a</i>  |
|                 |             | ♀     | 8.69  | 2.6                | 0.66             |           |
| Food-deprived   | 15          | ♂     | 16.76 | 6.2                | 0.81             | <i>ns</i> |
|                 |             | ♀     | 6.36  | 1.9                | 0.62             |           |
|                 | 30          | ♂     | 21.83 | 5.7                | 0.96             | <i>ns</i> |
|                 |             | ♀     | 36.23 | 18.3               | 0.95             |           |
|                 | 45          | ♂     | 20.16 | 14.7               | 0.60             | <i>b</i>  |
|                 |             | ♀     | 82.01 | 21.7               | 1.55             |           |
|                 | 5           | ♂     | 33.80 | 11.4               | 1.22             | <i>a</i>  |
|                 |             | ♀     | 7.54  | 1.8                | 0.73             |           |
|                 | 15          | ♂     | 29.50 | 6.8                | 1.21             | <i>ns</i> |
|                 |             | ♀     | 15.85 | 4.0                | 1.04             |           |
| Water-deprived  | 30          | ♂     | 26.06 | 8.6                | 1.04             | <i>ns</i> |
|                 |             | ♀     | 33.10 | 10.6               | 1.14             |           |
|                 | 45          | ♂     | 20.86 | 4.9                | 1.03             | <i>ns</i> |
|                 |             | ♀     | 21.05 | 6.0                | 1.08             |           |

Where: ♂: males, ♀: females and *ns*: non-significant

During the nighttime period, 5-days-old males in the deprived of food group and the deprived water group are more active than their female counterparts, while 45-days-old females in the deprived of food group are more active than their male counterparts.
